# Supplementary material for: CO&lt;sub&gt;2&lt;/sub&gt; emissions from German drinking water reservoirs estimated from routine monitoring data
Source: Copernicus journal article supplement (doi:10.5194/bg-2015-648), 2016-01-18
Supplement: Supplementary file 1 [file bg-2015-648-supplement.pdf]

- 1 Table. S1: List of reservoirs, elevation and corresponding weather stations and distance
- 2 between reservoir and weather station.

| reservoir name                      | Lat    | Long   | elevation<br>(m a.sl) | weather station             | distance<br>(km) |
|-------------------------------------|--------|--------|-----------------------|-----------------------------|------------------|
| Carlsfeld                           | 50.425 | 12.596 | 902.62                | Carlsfeld                   | 1                |
| Cranzahl                            | 50.507 | 13     | 714.17                | Marienberg                  | 19               |
| Deesbach<br>(Leibis-Lichte)         | 50.576 | 11.17  | 461.07                | Neuhaus am<br>Rennweg       | 9                |
| Dreilägerbach                       | 50.66  | 6.208  | 391.5                 | Kall-Sistig                 | 29               |
| Droeda                              | 50.399 | 12.059 | 432.94                | Hof                         | 15               |
| Ecker                               | 51.84  | 10.58  | 557.95                | Wernigerode                 | 13               |
| Eibenstock                          | 50.53  | 12.6   | 536.66                | Carlsfeld                   | 11               |
| Erletor                             | 50.58  | 10.75  | 525.6                 | Meiningen                   | 26               |
| Falkenstein                         | 50.468 | 12.378 | 560                   | Carlsfeld                   | 17               |
| Gottleuba                           | 50.838 | 13.93  | 420.75                | Lichtenhain-<br>Mittelndorf | 23               |
| Kall                                | 50.644 | 6.311  | 420.77                | Kall-Sistig                 | 29               |
| Kleine Kinzig                       | 48.4   | 8.366  | 605.8                 | Freudenstadt                | 7                |
| Kleine Kinzig<br>pre-dam            | 48.4   | 8.366  | 605.8                 | Freudenstadt                | 7                |
| Lehnmuehle                          | 50.836 | 13.59  | 517.96                | Zinnwald-<br>Georgenfeld    | 16               |
| Lichtenberg                         | 50.81  | 13.45  | 490.58                | Zinnwald-<br>Georgenfeld    | 23               |
| Malter                              | 50.927 | 13.656 | 326.5                 | Zinnwald-<br>Georgenfeld    | 23               |
| Muldenberg                          | 50.41  | 12.4   | 712.4                 | Carlsfeld                   | 15               |
| Muldenberg<br>Rote Mulde pre<br>dam | 50.41  | 12.4   | 712.4                 | Carlsfeld                   | 15               |
| Muldenberg<br>Weiße Mulde           | 50.41  | 12.4   | 712.4                 | Carlsfeld                   | 15               |

|                            |         |             |        |                      |    |
|----------------------------|---------|-------------|--------|----------------------|----|
| pre dam                    |         |             |        |                      |    |
| Neunzehnhain               | 50.71   | 13.15       | 525.05 | Marienberg           | 7  |
| Neustadt                   | 51.578  | 10.864      | 445.98 | Wernigerode          | 31 |
| Ohra                       | 50.765  | 10.72       | 525    | Schmücke             | 14 |
| Pirk                       | 50.427  | 12.097      | 383.5  | Plauen               | 7  |
| Poehl                      | 50.55   | 12.18       | 372.5  | Plauen               | 8  |
| Rappbode pre dam           | 51.42   | 10.47       | 432    | Wernigerode          | 14 |
| Hassel pre dam             | 51.42   | 10.49       | 432    | Wernigerode          | 14 |
| Königshütte pre dam        | 51.44   | 10.47       | 423    | Wernigerode          | 12 |
| Rauschenbach               | 50.69   | 13.498      | 593.78 | Zinnwald-Georgenfeld | 18 |
| Riveris                    | 49.707  | 6.76        | 319    | Trier-Petrisberg     | 9  |
| Rurtalsperre Schwammenauel | 50.637  | 6.442       | 281.5  | Kall-Sistig          | 16 |
| Saidenbach                 | 50.73   | 13.218<br>9 | 436.67 | Marienberg           | 10 |
| Scheibe-Alsbach            | 50.488  | 11.08       | 662.34 | Neuhaus am Rennweg   | 4  |
| Söse pre-dam               | 51.746  | 10.352      | 333    | Braunlage            | 18 |
| Sösestausee                | 51.738  | 10.31       | 326.5  | Braunlage            | 20 |
| Sosa                       | 50.49   | 12.64       | 636.97 | Carlsfeld            | 7  |
| Stollberg                  | 50.715  | 12.8        | 443.37 | Chemnitz             | 10 |
| Wahnbach                   | 50.805  | 7.284       | 124.1  | Köln-Bonn            | 11 |
| Wahnbach pre dam           | 50.805  | 7.284       | 124.1  | Köln-Bonn            | 11 |
| Werda                      | 50.4496 | 12.305      | 591.49 | Plauen               | 13 |

3

4

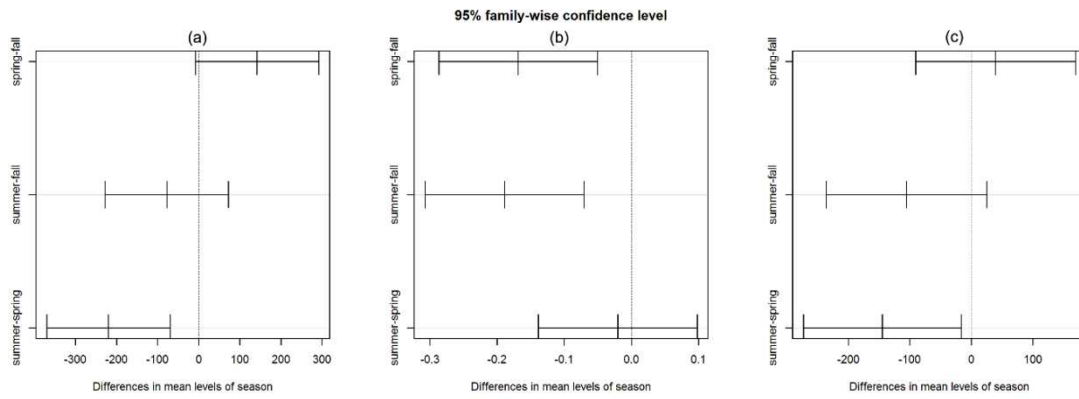

5

6 Figure S1: Tukey Honest Significant Differences for the seasonal fluctuation of CO<sub>2</sub>  
 7 concentration (a), K (b), and CO<sub>2</sub> flux (c).

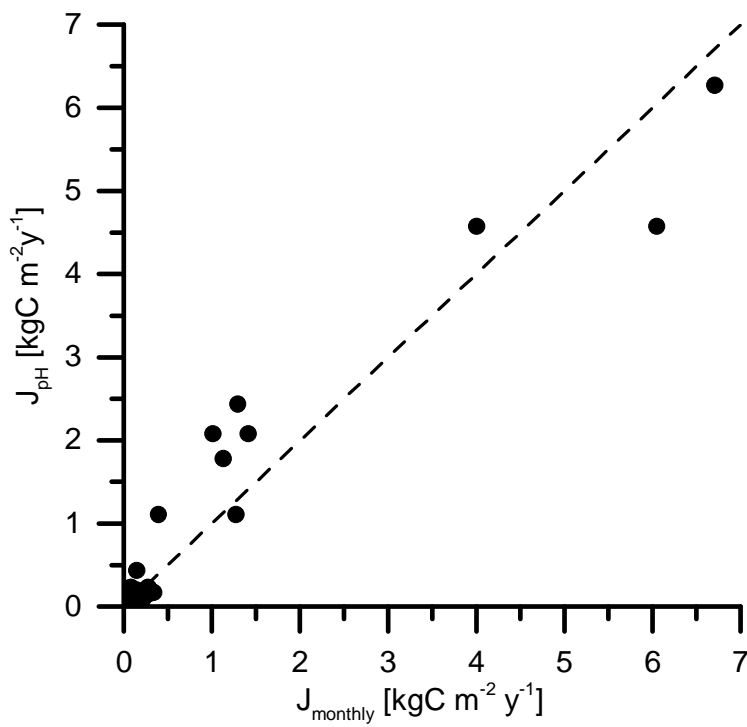

8

9 Figure S2: CO<sub>2</sub> flux from reservoirs calculated from pH compared with the flux calculated  
 10 from monthly CO<sub>2</sub> and K.

11

12 Table. S2: Mean and median data for the different reservoirs. Reservoirs have been made anonymous because of legal requirements.

| reservoir number | Mean CO <sub>2</sub> water (μmol l <sup>-1</sup> ) | MedianCO <sub>2</sub> water (μmol l <sup>-1</sup> ) | K (m/day) | Mean flux Monthly (g C m <sup>-2</sup> yr <sup>-1</sup> ) | Median flux Monthly (g C m <sup>-2</sup> yr <sup>-1</sup> ) | Mean flux Hourly (g C m <sup>-2</sup> yr <sup>-1</sup> ) | Median flux Hourly (g C m <sup>-2</sup> yr <sup>-1</sup> ) | DOC (mg l <sup>-1</sup> ) | TIC (mg l <sup>-1</sup> ) | pH   | Mean Total Alkalinity (eq l <sup>-1</sup> ) | Median Total Alkalinity (eq l <sup>-1</sup> ) | flux/reservoir (t y <sup>-1</sup> ) | CO2 content reservoir (t) | TIC content reservoir (t) | Flux calculated from pH (g C m <sup>-2</sup> yr <sup>-1</sup> ) |
|------------------|----------------------------------------------------|-----------------------------------------------------|-----------|-----------------------------------------------------------|-------------------------------------------------------------|----------------------------------------------------------|------------------------------------------------------------|---------------------------|---------------------------|------|---------------------------------------------|-----------------------------------------------|-------------------------------------|---------------------------|---------------------------|-----------------------------------------------------------------|
| 1                | 1758                                               | 1579                                                | 1.37      | 6936                                                      | 6051                                                        | 8921                                                     | 7386                                                       | 1.53                      |                           | 5.1  | 0.00005                                     | 0.00005                                       | 1259                                | 21.4                      |                           | 4575                                                            |
| 2                | 4062                                               | 2365                                                | 0.70      | 10209                                                     | 6710                                                        | 9052                                                     | 5393                                                       | 4.87                      |                           | 4.9  | 0.00005                                     | 0.00005                                       | 2535                                | 86.1                      |                           | 6271                                                            |
| 3                | 2694                                               | 1614                                                | 0.64      | 5525                                                      | 4007                                                        | 6763                                                     | 3410                                                       | 3.99                      |                           | 5.1  | 0.00006                                     | 0.00005                                       | 3137                                | 111.8                     |                           | 4575                                                            |
| 4                | 1211                                               | 1096                                                | 0.53      | 1773                                                      | 1413                                                        | 2795                                                     | 2556                                                       |                           |                           | 5.6  | 0.00009                                     | 0.00008                                       | 59                                  |                           |                           | 2081                                                            |
| 5                | 1219                                               | 544                                                 | 0.53      | 1905                                                      | 1272                                                        | 2889                                                     | 1927                                                       |                           |                           | 6.0  | 0.00012                                     | 0.00011                                       | 35                                  |                           |                           | 1109                                                            |
| 6                | 1006                                               | 772                                                 | 0.56      | 1693                                                      | 1293                                                        | 2345                                                     | 1799                                                       | 3.30                      |                           | 5.5  | 0.00007                                     | 0.00006                                       | 238                                 | 11.1                      |                           | 2435                                                            |
| 7                | 894                                                | 497                                                 | 0.70      | 1659                                                      | 1012                                                        | 2516                                                     | 1538                                                       | 1.81                      |                           | 5.6  | 0.00006                                     | 0.00006                                       | 605                                 | 35.4                      |                           | 2081                                                            |
| 8                | 603                                                | 557                                                 | 0.57      | 1188                                                      | 1129                                                        | 1363                                                     | 1121                                                       | 6.15                      | 0.39                      | 5.7  | 0.00008                                     | 0.00008                                       | 760                                 | 88.7                      | 5.2                       | 1777                                                            |
| 9                | 550                                                | 300                                                 | 0.62      | 1059                                                      | 393                                                         | 1428                                                     | 709                                                        | 3.72                      |                           | 6.0  | 0.00009                                     | 0.00008                                       | 305                                 | 17.6                      |                           | 1109                                                            |
| 10               | 99                                                 | 77                                                  | 1.03      | 274                                                       | 280                                                         | 325                                                      | 352                                                        |                           |                           | 7.0  | 0.00025                                     | 0.00022                                       | 218                                 | 12.3                      |                           | 232                                                             |
| 11               | 74                                                 | 47                                                  | 2.02      | 439                                                       | 213                                                         | 379                                                      | 267                                                        | 3.63                      |                           | 7.7  | 0.00049                                     | 0.00045                                       | 224                                 | 5.0                       |                           | 79                                                              |
| 12               | 71                                                 | 59                                                  | 1.99      | 350                                                       | 273                                                         | 385                                                      | 250                                                        | 3.36                      |                           | 7.0  | 0.00022                                     | 0.00018                                       | 288                                 | 10.8                      |                           | 232                                                             |
| 13               | 118                                                | 119                                                 | 0.66      | 213                                                       | 201                                                         | 240                                                      | 237                                                        |                           |                           | 7.4  | 0.00091                                     | 0.00088                                       | 24                                  |                           |                           | 125                                                             |
| 14               | 61                                                 | 44                                                  | 1.79      | 218                                                       | 151                                                         | 293                                                      | 212                                                        | 3.22                      |                           | 7.3  | 0.00028                                     | 0.00027                                       | 286                                 | 11.6                      |                           | 146                                                             |
| 15               | 66                                                 | 66                                                  | 1.96      | 340                                                       | 340                                                         | 194                                                      | 194                                                        | 1.97                      |                           | 7.2  | 0.00034                                     | 0.00034                                       | 1519                                | 160.5                     |                           | 170                                                             |
| 16               | 122                                                | 107                                                 | 0.52      | 198                                                       | 149                                                         | 222                                                      | 184                                                        | 2.26                      |                           | 6.6  | 0.00013                                     | 0.00014                                       | 681                                 | 95.9                      |                           | 433                                                             |
| 17               | 78                                                 | 74                                                  | 0.86      | 153                                                       | 163                                                         | 265                                                      | 183                                                        | 3.00                      | 2.98                      | 7.9  | 0.00041                                     | 0.00042                                       | 40                                  | 2.9                       | 9.6                       | 59                                                              |
| 18               | 72                                                 | 76                                                  | 0.64      | 108                                                       | 102                                                         | 172                                                      | 172                                                        |                           |                           | 7.1  | 0.00023                                     | 0.00023                                       | 2                                   |                           |                           | 199                                                             |
| 19               | 97                                                 | 97                                                  | 0.56      | 145                                                       | 148                                                         | 171                                                      | 168                                                        | 1.75                      | 3.26                      | 7.1  | 0.00037                                     | 0.00036                                       | 24                                  |                           |                           | 199                                                             |
| 20               | 76                                                 | 78                                                  | 0.55      | 145                                                       | 157                                                         | 139                                                      | 167                                                        | 2.85                      | 9.68                      | 7.4  | 0.00063                                     | 0.00062                                       | 23                                  | 1.2                       | 11.9                      | 125                                                             |
| 21               | 40                                                 | 40                                                  | 2.17      | 225                                                       | 274                                                         | 158                                                      | 158                                                        | 0.92                      |                           | 7.3  | 0.00024                                     | 0.00022                                       | 130                                 | 8.6                       |                           | 146                                                             |
| 22               | 139                                                | 62                                                  | 0.87      | 396                                                       | 115                                                         | 373                                                      | 153                                                        | 2.39                      | 5.34                      | 7.6  | 0.00056                                     | 0.00057                                       | 38                                  | 1.5                       | 11.0                      | 92                                                              |
| 23               | 45                                                 | 37                                                  | 2.09      | 183                                                       | 136                                                         | 177                                                      | 151                                                        | 2.57                      |                           | 7.5  | 0.00036                                     | 0.00033                                       | 140                                 | 6.4                       |                           | 107                                                             |
| 24               | 68                                                 | 65                                                  | 0.76      | 164                                                       | 71                                                          | 137                                                      | 132                                                        |                           |                           | 7.7  | 0.00066                                     | 0.00071                                       | 32                                  | 1.0                       |                           | 79                                                              |
| 25               | 57                                                 | 58                                                  | 0.70      | 93                                                        | 77                                                          | 130                                                      | 127                                                        |                           |                           | 7.0  | 0.00019                                     | 0.00018                                       | 34                                  | 3.2                       |                           | 232                                                             |
| 26               | 103                                                | 70                                                  | 0.49      | 97                                                        | 88                                                          | 134                                                      | 97                                                         | 2.66                      |                           | 7.0  | 0.00021                                     | 0.00021                                       | 28                                  | 2.4                       |                           | 232                                                             |
| 27               | 81                                                 | 38                                                  | 0.90      | 148                                                       | 65                                                          | 143                                                      | 94                                                         | 1.32                      | 2.04                      | 7.5  | 0.00024                                     | 0.00026                                       | 5                                   | 0.2                       | 0.9                       | 107                                                             |
| 28               | 62                                                 | 63                                                  | 0.63      | 85                                                        | 80                                                          | 97                                                       | 94                                                         |                           |                           | 7.6  | 0.00087                                     | 0.00087                                       | 187                                 | 31.2                      |                           | 92                                                              |
| 29               | 64                                                 | 60                                                  | 0.78      | 187                                                       | 99                                                          | 128                                                      | 93                                                         |                           |                           | 8.0  | 0.00082                                     | 0.00087                                       | 24                                  | 1.0                       |                           | 51                                                              |
| 30               | 63                                                 | 60                                                  | 0.53      | 71                                                        | 73                                                          | 94                                                       | 89                                                         | 2.05                      | 2.62                      | 7.2  | 0.00030                                     | 0.00029                                       | 110                                 | 18.4                      | 66.8                      | 170                                                             |
| 31               | 70                                                 | 63                                                  | 0.55      | 81                                                        | 78                                                          | 101                                                      | 80                                                         | 2.18                      |                           | 7.2  | 0.00024                                     | 0.00023                                       | 28                                  | 2.3                       |                           | 170                                                             |
| 32               | 48                                                 | 45                                                  | 0.93      | 101                                                       | 73                                                          | 130                                                      | 74                                                         |                           | 5.38                      | 7.7  | 0.00048                                     | 0.00046                                       | 14                                  | 1.1                       | 11.3                      | 79                                                              |
| 33               | 55                                                 | 45                                                  | 0.72      | 81                                                        | 65                                                          | 96                                                       | 74                                                         |                           |                           | 7.6  | 0.00057                                     | 0.00056                                       | 24                                  | 0.8                       |                           | 92                                                              |
| 34               | 43                                                 | 32                                                  | 1.03      | 91                                                        | 63                                                          | 105                                                      | 63                                                         | 3.48                      |                           | 7.5  | 0.00035                                     | 0.00031                                       | 37                                  | 5.0                       |                           | 107                                                             |
| 35               | 37                                                 | 30                                                  | 0.97      | 65                                                        | 30                                                          | 80                                                       | 53                                                         |                           | 3.79                      | 7.5  | 0.00035                                     | 0.00035                                       | 21                                  | 1.3                       | 13.9                      | 107                                                             |
| 36               | 35                                                 | 28                                                  | 0.67      | 23                                                        | 17                                                          | 57                                                       | 36                                                         | 5.78                      |                           | 8.4  | 0.00107                                     | 0.00108                                       | 45                                  | 5.8                       |                           | 29                                                              |
| 37               | 30                                                 | 28                                                  | 0.54      | 31                                                        | 27                                                          | 36                                                       | 33                                                         | 3.83                      |                           | 8.0  | 0.00048                                     | 0.00048                                       | 47                                  | 7.5                       |                           | 51                                                              |
| 38               | 22                                                 | 15                                                  | 0.56      | 4                                                         | -3                                                          | 17                                                       | 16                                                         | 6.00                      |                           | 8.7  | 0.00093                                     | 0.00093                                       | 62                                  | 11.2                      |                           | 19                                                              |
| 39               | 26                                                 | 21                                                  | 0.57      | 22                                                        | 0.4                                                         | 31                                                       | 14                                                         | 5.34                      |                           | 8.7  | 0.00075                                     | 0.00075                                       | 21                                  | 2.1                       |                           | 19                                                              |
| <b>Min</b>       | 22                                                 | 15                                                  | 0.5       | 4                                                         | -3                                                          | 17                                                       | 14                                                         | 0.92                      | 0.39                      | 4.90 | 5.0099E-05                                  | 0.00005                                       | 1.7                                 | 0.2                       | 0.9                       | 19.5                                                            |
| <b>Max</b>       | 4062                                               | 2365                                                | 2.17      | 10209                                                     | 6710                                                        | 9052                                                     | 7386                                                       | 6.15                      | 9.68                      | 8.70 | 0.001070077                                 | 0.00108                                       | 3137.2                              | 160.5                     | 66.8                      | 6270.6                                                          |
| <b>Median</b>    | 72                                                 | 63                                                  | 0.70      | 183                                                       | 148                                                         | 172                                                      | 167                                                        | 3.00                      | 3.26                      | 7.30 | 0.000296104                                 | 0.000293                                      | 46.7                                | 7.0                       | 11.1                      | 145.9                                                           |
| <b>Mean</b>      | 411                                                | 283                                                 | 0.90      | 940                                                       | 689                                                         | 1105                                                     | 766                                                        | 3.18                      | 3.94                      | 7.05 | 0.000374332                                 | 0.000368821                                   | 340.7                               | 23.0                      | 16.3                      | 769.1                                                           |
| <b>SD</b>        | 825                                                | 524                                                 | 0.51      | 2080                                                      | 1518                                                        | 2252                                                     | 1545                                                       | 1.44                      | 2.65                      | 0.98 | 0.000280654                                 | 0.000285253                                   | 679.8                               | 38.5                      | 20.8                      | 1442.4                                                          |
